# Supplementary material for: Development of a Gas-Tight Syringe Headspace GC-FID Method for the Detection of Ethanol, and a Description of the Legal and Practical Framework for Its Analysis, in Samples of English and Welsh Motorists’ Blood and Urine
Source: MDPI journal article supplement (doi:10.3390/molecules27154771), 2022-07-26
Supplement: s1 [file s1]

## Supplementary Figure S1

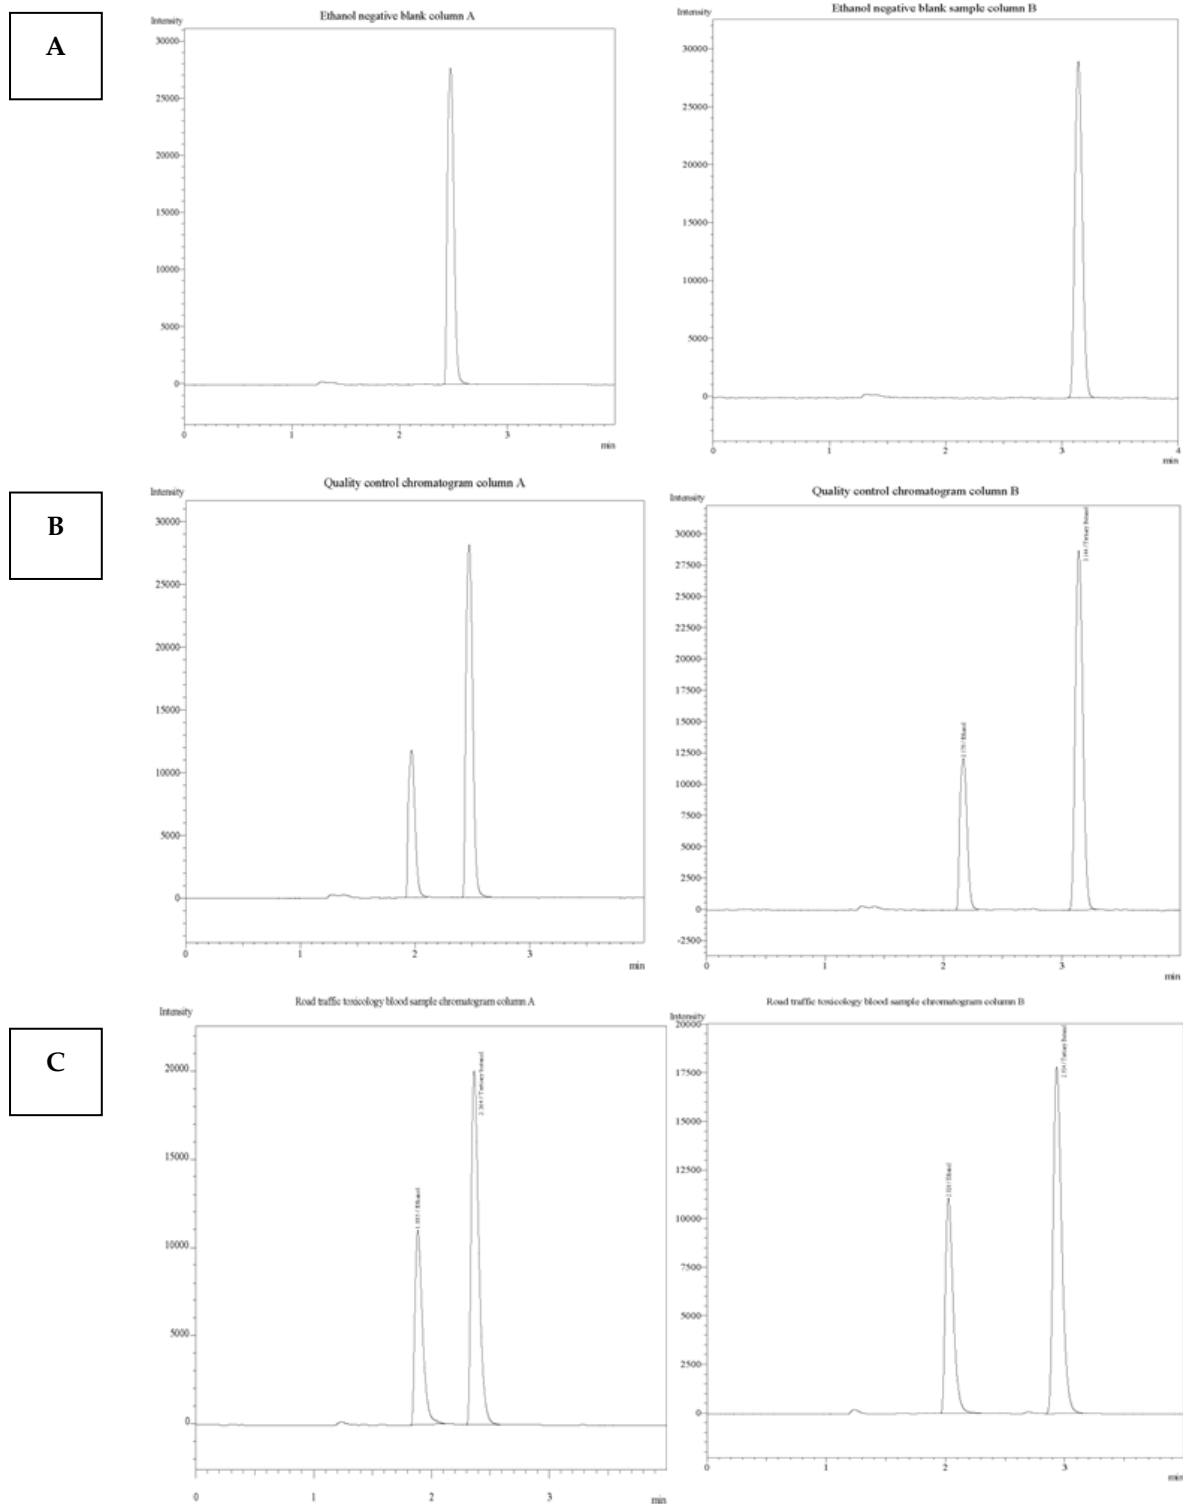

**Supplementary Figure S1:** Representative chromatograms of (A) Ethanol negative control samples with tertiary butanol internal standard, (B) QC samples spiked with 20 mg/100mL of ethanol and (C) a casework samples detected at 79mg/100mL.
